# Supplementary material
Source: HighWire-hosted journal article supplement (https://bmjopengastro.bmj.com/highwire/filestream/4205/field_highwire_adjunct_files/4/bmjgast-2024-001375supp005_data_supplement.pdf)

STATISITCAL ANALYSIS

Monthly counts of avoidable stent were also extracted between January 2020 to June 2022. To estimate the intervention effect, an interrupted time series (ITS) with segmented regression analysis was performed to determine if the change was statistically significant. ‘A time series is a continuous sequence of observations (values) on a population, taken repeatedly over time’<sup>1</sup>. When an intervention is introduced in a defined time period, it interrupts the time series, allowing for the identification of change in level (the value at the beginning of the segment in series) and trend (slope of the line) before and after an intervention<sup>1-4</sup>. Statistical analysis was performed using SAS Enterprise Guide 8.3 and AUTOREG procedures for ITS analysis. The approach used was to estimate the shifts in avoidable stent counts before and after the intervention.

RESULTS

Test statistics for the regression model suggested that the data had positive autocorrelation (Durbin-Waston (DW)=1.623, P-value<DW=0.0472 & P-value>DW=0.95), and data was stationary (p-value (Dickey-Fuller test) =0.0127). Autocorrelation function (ACFs) and Partial autocorrelation function (PACF) were used to identify the number of significant lags, where a lag is the number of time points between an observation and its previous values. As a result, AR (1) model was employed for this analysis. Table 7 shows the parameter estimates from ITS regression. Before the beginning of the observation/intervention period, the number of avoidable stents was 6.3. During pre-intervention period, the regression slope was -0.03 and showed no significant month-to-month change (p-value=0.825). The post intervention timeframe showed that immediately following the intervention, counts of avoidable stents significantly dropped by 6.1 (p-value=0.0088). The post-intervention timeframe indicated no significant change in the month-to-month trend/slope after intervention (p-value=0.3051) suggestive of sustained reduction.

Table 1. ITS Regression Estimate

| Variable                  | Estimate | SE   | t Value | P-value |
|---------------------------|----------|------|---------|---------|
| Intercept (Level)         | 6.29     | 1.49 | 4.22    | 0.0003  |
| Pre-Intervention (Slope)  | -0.03    | 0.15 | -0.22   | 0.8250  |
| Intervention (Level)      | -6.13    | 2.16 | -2.84   | 0.0088  |
| Post-Intervention (Slope) | 0.26     | 0.24 | 1.05    | 0.3051  |

## ERCP Single Series Interrupted Time Series (ITS) with Segmented Regression Supplemental File June 2024

## ITS using Segmented Regression Analysis

- Level change(immediate effect)
- Trend/Slope change(sustained effect)
- $y = \beta_0 + \beta_1 T + \beta_2 X + \beta_3 XT + \varepsilon$

$y$ -dependent variable;  $\beta$ -coefficient;  $X$ -independent variable (study phase-intervention);  $T$ -Time;  $\varepsilon$ -residual/random error (or deviation from linear relation)

Impact model for segmented regression analysis of ITS data with one interruption

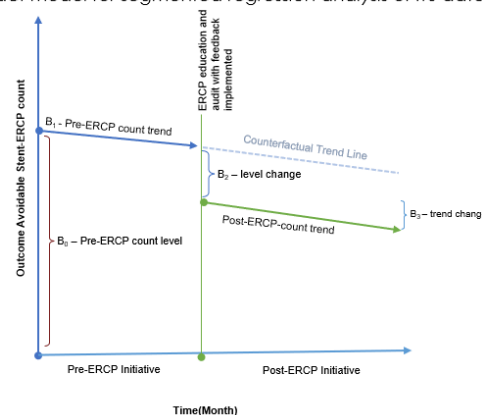**Figure 1:** Impact model for single series segmented regression analysis**Reference**

1. Bernal L, Cummins S, Gasparrini A. Interrupted time series regression for the evaluation of public health interventions: a Tutorial. *Intl J Epidemiol* 2017;46:348–55.
2. Chatfield, C. (2003). *The Analysis of Time Series: An Introduction*, Sixth Edition (6th ed.). Chapman and Hall/CRC. <https://doi.org/10.4324/9780203491683>
3. Linden A. Conducting interrupted time-series analysis for Single- and multiple-group comparisons. *The Stata Journal* 2015;15:480–500.
4. Ramsay CR, Matowe L, Grilli R, et al. Interrupted time series designs in health technology assessment: lessons from two systematic reviews of behavior change strategies. *Int J Technol Assess Health Care* 2003;19:613:613–23.:
5. Wagner AK, Soumerai SB, Zhang F, et al. Segmented regression analysis of interrupted time series studies in medication use research. *J Clin Pharm Ther* 2002;27:299–309.

ERCP Single Series Interrupted Time Series (ITS) with Segmented Regression Supplemental File June 2024

Appendix SAS Output:

|                    |        |
|--------------------|--------|
| Dependent Variable | counts |
|                    | counts |

| Ordinary Least Squares Estimates |            |                |            |
|----------------------------------|------------|----------------|------------|
| SSE                              | 172.600372 | DFE            | 26         |
| MSE                              | 6.63848    | Root MSE       | 2.57652    |
| SBC                              | 151.234548 | AIC            | 145.629759 |
| MAE                              | 1.82709976 | AICC           | 147.229759 |
| MAPE                             | 50.6682563 | HQC            | 147.422779 |
| Durbin-Watson                    | 1.6234     | Total R-Square | 0.5133     |

| Durbin-Watson Statistics |        |         |         |
|--------------------------|--------|---------|---------|
| Order                    | DW     | Pr < DW | Pr > DW |
| 1                        | 1.6234 | 0.0472  | 0.9528  |

*NOTE: Pr<DW is the p-value for testing positive autocorrelation, and Pr>DW is the p-value for testing negative autocorrelation.*

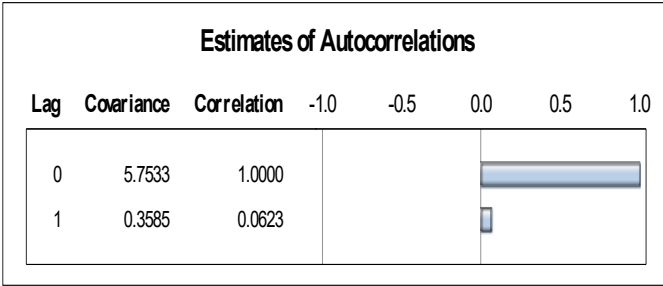

ERCP Single Series Interrupted Time Series (ITS) with Segmented Regression Supplemental File June 2024

|                 |        |
|-----------------|--------|
| Preliminary MSE | 5.7310 |
|-----------------|--------|

| Estimates of Autoregressive Parameters |             |                |         |
|----------------------------------------|-------------|----------------|---------|
| Lag                                    | Coefficient | Standard Error | t Value |
| 1                                      | -0.062311   | 0.199611       | -0.31   |

|                      |
|----------------------|
| Algorithm converged. |
|----------------------|

AR(1) Model

| Maximum Likelihood Estimates |            |                                 |            |
|------------------------------|------------|---------------------------------|------------|
| SSE                          | 171.523487 | DFE                             | 25         |
| MSE                          | 6.86094    | Root MSE                        | 2.61934    |
| SBC                          | 154.457021 | AIC                             | 147.451034 |
| MAE                          | 1.84597371 | AICC                            | 149.951034 |
| MAPE                         | 50.8629907 | HQC                             | 149.69231  |
| Log Likelihood               | -68.725517 | Transformed Regression R-Square | 0.4699     |
| Durbin-Watson                | 1.7785     | Total R-Square                  | 0.5164     |
|                              |            | Observations                    | 30         |

| Durbin-Watson Statistics |        |         |         |
|--------------------------|--------|---------|---------|
| Order                    | DW     | Pr < DW | Pr > DW |
| 1                        | 1.7785 | 0.1119  | 0.8881  |

*NOTE: Pr<DW is the p-value for testing positive autocorrelation, and Pr>DW is the p-value for testing negative autocorrelation.*

ERCP Single Series Interrupted Time Series (ITS) with Segmented Regression Supplemental File June 2024

| Parameter Estimates       |    |          |                |         |                |  |
|---------------------------|----|----------|----------------|---------|----------------|--|
| Variable                  | DF | Estimate | Standard Error | t Value | Approx Pr >  t |  |
| Intercept (Level)         | 1  | 6.2891   | 1.4952         | 4.21    | 0.0003         |  |
| Pre-Intervention (Slope)  | 1  | -0.0344  | 0.1541         | -0.22   | 0.8253         |  |
| Intervention (Level)      | 1  | -6.1309  | 2.1632         | -2.83   | 0.0090         |  |
| Post-Intervention (Slope) | 1  | 0.2563   | 0.2452         | 1.05    | 0.3058         |  |
| AR1                       | 1  | -0.0949  | 0.2019         | -0.47   | 0.6426         |  |

| Variable                  | DF | Estimate | Standard Error | t Value | Approx Pr >  t |
|---------------------------|----|----------|----------------|---------|----------------|
| Intercept (Level)         | 1  | 6.2891   | 1.4914         | 4.22    | 0.0003         |
| Pre-Intervention (Slope)  | 1  | -0.0344  | 0.1538         | -0.22   | 0.8250         |
| Intervention (Level)      | 1  | -6.1309  | 2.1588         | -2.84   | 0.0088         |
| Post-Intervention (Slope) | 1  | 0.2563   | 0.2448         | 1.05    | 0.3051         |

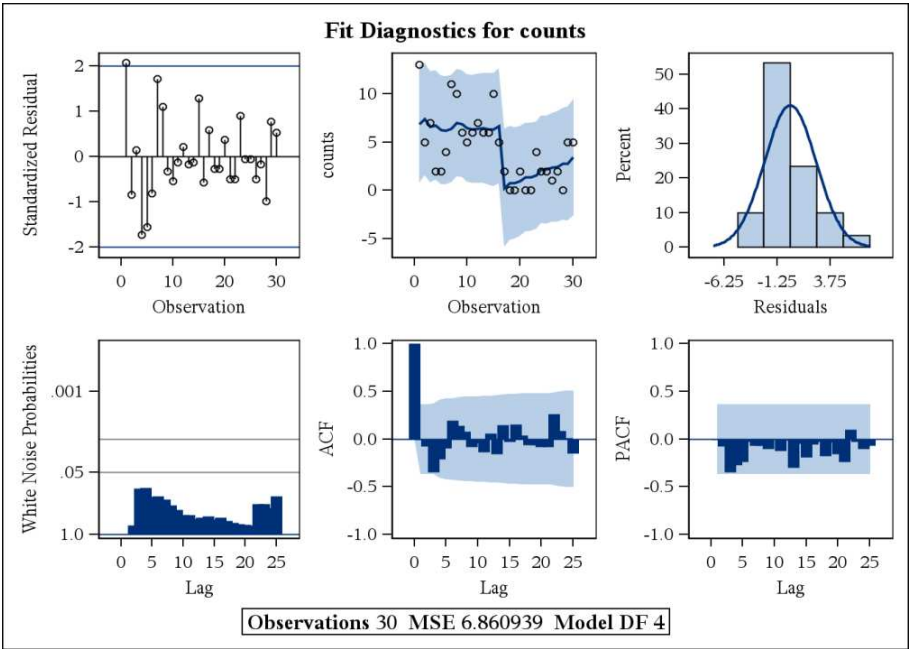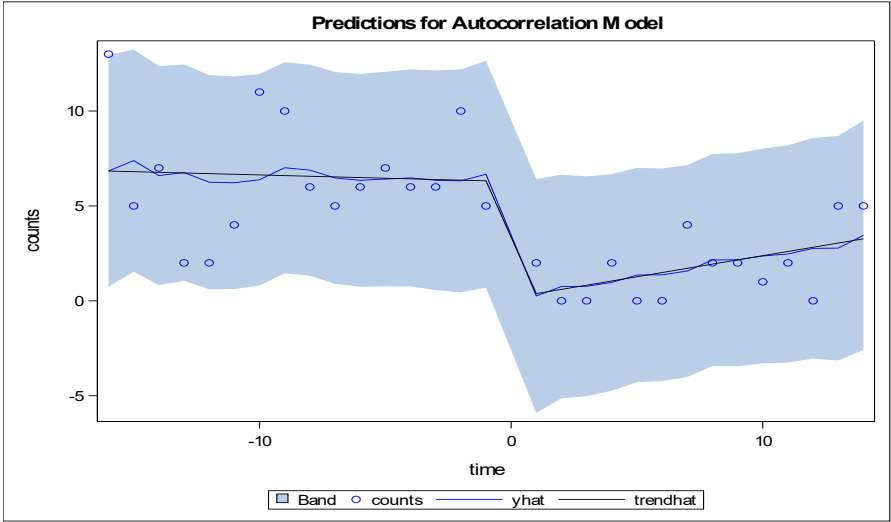

| Name of Variable = counts |          |
|---------------------------|----------|
| Mean of Working Series    | 4.333333 |
| Standard Deviation        | 3.438346 |
| Number of Observations    | 30       |

| Autocorrelation Check for White Noise |            |    |            |                  |       |       |       |       |       |
|---------------------------------------|------------|----|------------|------------------|-------|-------|-------|-------|-------|
| To Lag                                | Chi-Square | DF | Pr > ChiSq | Autocorrelations |       |       |       |       |       |
| 6                                     | 16.02      | 6  | 0.0136     | 0.499            | 0.294 | 0.090 | 0.145 | 0.166 | 0.259 |

| Dickey-Fuller Unit Root Tests |      |          |          |       |          |      |        |
|-------------------------------|------|----------|----------|-------|----------|------|--------|
| Type                          | Lags | Rho      | Pr < Rho | Tau   | Pr < Tau | F    | Pr > F |
| Zero Mean                     | 0    | -6.8847  | 0.0614   | -2.48 | 0.0150   |      |        |
| Single Mean                   | 0    | -14.5339 | 0.0256   | -3.57 | 0.0127   | 6.52 | 0.0113 |
| Trend                         | 0    | -17.8645 | 0.0501   | -3.57 | 0.0504   | 7.07 | 0.0420 |

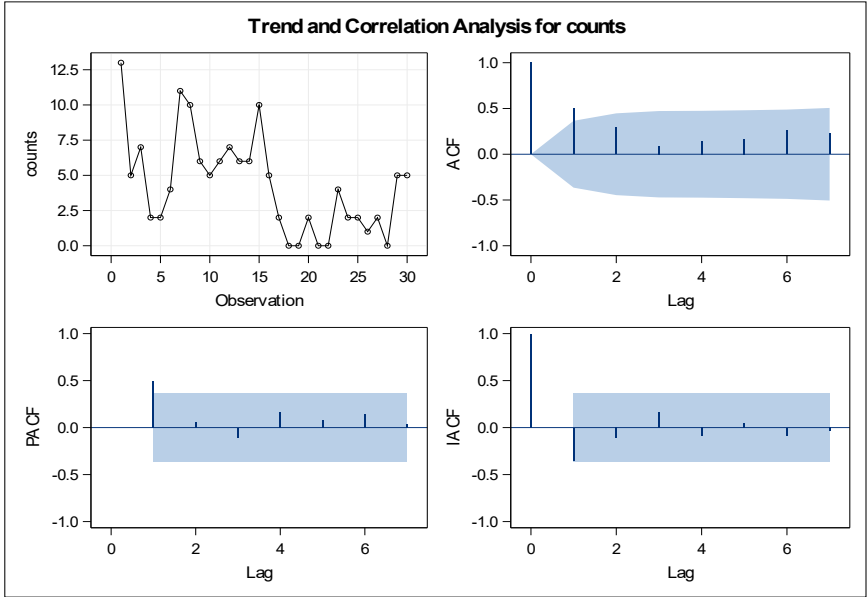

Supplement: bmjgast-2024-001375supp005_data_supplement.pdf [file bmjgast-2024-001375supp005_data_supplement.pdf]
